# Supplementary material
Source: Elsevier journal article supplement (https://www.sciencedirect.com/science/article/pii/S0300893215002985)
Supplement: mmc1 [file S0300893215002985:mmc1.pdf]

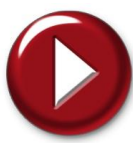

## Material suplementario

---

### Seguimiento a largo plazo tras implante valvular aórtico percutáneo por estenosis aórtica grave

Pablo Salinas<sup>a,\*</sup>, Raúl Moreno<sup>a</sup>, Luis Calvo<sup>a</sup>, Ángel Sánchez-Recalde<sup>a</sup>, Santiago Jiménez-Valero<sup>a</sup>, Guillermo Galeote<sup>a</sup>, Teresa López-Fernández<sup>a</sup>, Ulises Ramírez<sup>b</sup>, Luis Riera<sup>c</sup>, Ignacio Plaza<sup>d</sup>, Isidro Moreno<sup>e</sup>, José María Mesa<sup>b</sup> y José Luis López-Sendón<sup>a</sup>

<sup>a</sup>*Servicio de Cardiología, Hospital Universitario La Paz, Madrid, España*

<sup>b</sup>*Servicio de Cirugía Cardíaca, Hospital Universitario La Paz, Madrid, España*

<sup>c</sup>*Servicio de Cirugía Vascular, Hospital Universitario La Paz, Madrid, España*

<sup>d</sup>*Servicio de Cardiología, Hospital Infanta Sofía, San Sebastián de los Reyes, Madrid, España*

<sup>e</sup>*Servicio de Anestesia y Reanimación, Hospital Universitario La Paz, Madrid, España*

---

## ANEXO 1

### Definiciones de las variables empleadas

#### A. Características basales de los pacientes

##### a. Variables clínicas

- Aclaramiento de creatinina (ml/min). Según fórmula de Cockcroft-Gault.
- Área de superficie corporal estimada mediante fórmula de Du Bois.
- Cardiopatía isquémica. Antecedentes de cardiopatía isquémica clínica, en cualquiera de sus variantes (angina, infarto agudo de miocardio previo, etc.).
- Creatinina basal (mg/dl). Estimada antes del procedimiento.
- Diabetes mellitus. Glucohemoglobina > 6,5% en al menos dos ocasiones. Subclasificada en insulín dependiente y no insulín dependiente.

- Dislipemia. Definido como colesterol unido a lipoproteínas de baja densidad > 115 mg/dl.
- Edad. Estimada en el momento de realización del procedimiento de implante percutáneo de válvula aórtica (TAVI) o en el de la decisión del *Heart Team* en los pacientes no seleccionados.
- Enfermedad coronaria. Presencia de lesiones > 50% en cateterismo pre-TAVI o revascularización previa.
- Enfermedad pulmonar obstructiva crónica.
- EuroSCORE. Escala de riesgo quirúrgico<sup>1</sup>.
- EuroSCORE-2. Escala de riesgo quirúrgico<sup>2</sup>.
- Fecha de realización del procedimiento. Punto de referencia para calcular el tiempo de seguimiento de los análisis de supervivencia.
- Fecha de decisión del *Heart Team*. Punto de referencia para calcular el tiempo de seguimiento de los análisis de supervivencia en el grupo de pacientes rechazados para TAVI.
- Fibrilación auricular. Antecedentes de fibrilación auricular o aleteo auricular.
- Fumador. Antecedentes de tabaquismo o fumador activo.
- Hipertensión. Presión arterial en consulta > 140/90 mmHg en al menos dos determinaciones separadas. Las mediciones de presión se deben realizar según la guía clínica de la Sociedad Europea de Cardiología.
- Infarto agudo de miocardio previo. Antecedentes de cualquier síndrome coronario agudo.
- Ictus previo. Antecedentes de ictus o accidente isquémico transitorio.
- Antecedentes de intervención coronaria percutánea.
- Índice de masa corporal. Estimado por la fórmula de Quetelet.
- Insuficiencia respiratoria. Cualquier enfermedad respiratoria que condicione una presión arterial de oxígeno basal (sin aporte de oxígeno) < 60 mmHg.
- Insuficiencia tricuspídea. Subclasificada en inexistente, leve, moderada o grave, según la guía de práctica clínica para la enfermedad valvular de la Sociedad Europea de Cardiología.
- Insuficiencia renal crónica. Definida con los criterios de la escala EuroSCORE-1 (creatinina basal > 200  $\mu$ mol/l) y no estar en tratamiento de hemodiálisis.
- Insuficiencia renal crónica en hemodiálisis.

- Neoplasia. Antecedentes de neoplasia o neoplasia activa.
- Clase funcional de la *New York Heart Association* I-IV antes del procedimiento.
- Marcapasos. Portador de marcapasos definitivo.
- Modelo de prótesis: Edwards SAPIEN THV o Edwards SAPIEN XT.
- Procedimiento *off-label*. Procedimientos fuera de las indicaciones aprobadas (*valve-in-valve*, procedimientos con prótesis mitrales preexistentes, etc.).
- Revascularización quirúrgica previa.
- Revascularización previa. En cualquiera de sus modalidades.
- Sexo.
- *Society of Thoracic Surgeons*<sup>3</sup>, escala de riesgo de la sociedad norteamericana de cirujanos cardiorácicos.
- Vasculopatía periférica. Presencia de ateromatosis clínica en territorios distintos del cardíaco y el cerebral. Habitualmente, se trata de enfermedad vascular de extremidades inferiores.

*b. Variables derivadas de técnicas de imagen*

- Área valvular aórtica por continuidad ( $\text{cm}^2$ ) basal, post-TAVI y en el seguimiento. Para el cálculo del área protésica post-TAVI, se tomó como diámetro del tracto de salida la medida de la prótesis (23, 26 o 29 mm).
- Área valvular aórtica por planimetría ( $\text{cm}^2$ ).
- Área valvular aórtica indexada ( $\text{cm}^2/\text{m}^2$ ). Se refiere al área valvular aórtica calculada por ecuación de continuidad y ajustado al área de superficie corporal.
- Anillo aórtico basal por ecocardiograma transesofágico (mm). Diámetro del anillo aórtico a nivel de la base de implantación de los velos.
- Fracción de eyección del ventrículo izquierdo (%). Determinada en el ecocardiograma por método de Simpson.
- Gradiente máximo (mmHg). Determinado en el ecocardiograma.
- Gradiente medio (mmHg). Determinado en el ecocardiograma.
- Hipertensión pulmonar (ecocardiográfica). Presión sistólica pulmonar estimada en el ecocardiograma  $\geq 35$  mmHg.
- Insuficiencia aórtica basal. Subclasificada en inexistente, leve, moderada o grave, según la guía de práctica clínica para la enfermedad valvular de la Sociedad Europea de Cardiología.

- Insuficiencia aórtica post-TAVI y en el seguimiento. Subclasificada en inexistente, leve, moderada o grave.
- Masa ventricular (gramos) basal y en el seguimiento. Estimada por la fórmula de Devereux.
- Masa ventricular indexada basal y en el seguimiento. Ajustada al área de superficie corporal.
- Presión sistólica pulmonar basal, post-TAVI y en el seguimiento. Determinada en el ecocardiograma, a partir de la velocidad de regurgitación tricuspídea.

***B. Variables peri-TAVI y post-TAVI***

- Cirugía cardíaca urgente. Necesidad durante el implante o en el postoperatorio de técnicas de cirugía cardíaca: esternotomía, *bypass* cardiopulmonar, reconversión a sustitución valvular quirúrgica, etc.
- Complicaciones. Número y tipo de complicaciones surgidas peri-TAVI o post-TAVI.
- Complicaciones respiratorias. Todo paciente con insuficiencia respiratoria gasométrica (presión arterial de oxígeno < 60 mmHg) cuyo origen no fuese insuficiencia cardíaca.
- Complicaciones vasculares del punto de acceso y relacionadas con el punto de acceso.

Recogido según las definiciones del *Valve Academic Research Consortium (VARC) 2*:

***a. Complicaciones vasculares mayores***

- Cualquier disección aórtica, rotura aórtica, rotura del anillo aórtico, perforación del ventrículo izquierdo, nuevo aneurisma o pseudoaneurisma apical, o
- Daño vascular en el punto de acceso o relacionado con el punto de acceso (disección, estenosis, perforación, rotura, fístula arteriovenosa, pseudoaneurisma, hematoma, lesión nerviosa irreversible, síndrome compartimental o fallo de los dispositivos de cierre percutáneo) que conlleva la muerte, amenaza para la vida o hemorragia mayor (según definiciones del VARC) isquemia visceral o deterioro neurológico, o

- Embolización distal (no cerebral) de origen vascular que requiere cirugía o que causa la amputación o daño irreversible de órganos diana, o
- Uso no planificado de intervención endovascular o quirúrgica asociada que conlleva muerte, hemorragia grave, isquemia visceral o deterioro neurológico, o
- Cualquier isquemia nueva de las extremidades inferiores homolateral documentada por síntomas, examen físico y/o una disminución o ausencia de flujo sanguíneo en la angiografía de la extremidad inferior, o
- Cirugía de lesión nerviosa relacionada con el punto de acceso, o
- Lesión nerviosa permanente relacionada con el punto de acceso.

*b. Complicaciones vasculares menores*

- Daño vascular en el punto de acceso o relacionado con el punto de acceso (dissección, estenosis, perforación, rotura, fístula arteriovenosa, pseudoaneurisma, hematoma, lesión nerviosa irreversible, síndrome compartimental, fallo de los dispositivos de cierre percutáneo) que no conlleva la muerte, amenaza para la vida o hemorragia mayor (según definiciones del VARC), isquemia visceral o deterioro neurológico, o
- Embolización distal tratada con embolectomía y/o trombectomía y que no conlleva cirugía ni causa la amputación o daño irreversible de órganos diana, o
- Cualquier implante no planificado de *stent* endovascular o intervención quirúrgica que no cumple criterios de una complicación vascular mayor, o
- Reparación vascular o la necesidad de reparación vascular (cirugía, compresión guiada por ultrasonido, embolización transcatéter o *stent graft*).

*c. Fallo en el dispositivo de cierre percutáneo*

- Fallo de un dispositivo de cierre para lograr la hemostasia en el sitio de arteriotomía que conduce a un tratamiento alternativo (que no sea la compresión manual o dilatación con balón endovascular adyuvante).
- Cualquier insuficiencia renal post-TAVI. Reúne los eventos de insuficiencia renal post-TAVI sin y con necesidad de hemodiálisis.
- Cualquier hemorragia post-TAVI. Hemorragia en cualquier grado.

- Endocarditis. Según definición del VARC-2, por criterios de Duke o evidencia de absceso, fuga perivalvular o vegetación confirmada como secundaria a infección por análisis histológico o microbiológico durante una reoperación o la autopsia.
- Embolización. Según definición del VARC-2, desplazamiento durante o después del implante de la prótesis de su posición deseada en el anillo aórtico.
- Estancia (días). Calculada desde el ingreso del paciente en el hospital (estancia total) y desde el día del TAVI (estancia post-TAVI). Los pacientes programados ingresaban habitualmente 36 h antes de la intervención.
- Éxito del implante. Implante en su correcta posición de una prótesis valvular sin muerte en el procedimiento. Véase también variable combinada del VARC-2.
- Evento adverso mayor. Utilizado para los eventos en el seguimiento. Se utilizó la definición de la variable combinada eficacia clínica.
- Fibrilación auricular post-TAVI. Cualquier episodio detectado tras más de 30 min o que obligase a modificar el tratamiento médico. Solo se consideró para los pacientes sin antecedentes de fibrilación auricular.
- Infarto agudo de miocardio peri-TAVI o post-TAVI. Recogido según las definiciones del VARC-2:

*1. Infarto agudo de miocardio peri-TAVI (< 72 h tras el procedimiento):*

- Nuevos síntomas isquémicos (p. ej., dolor torácico o disnea) o nuevos signos isquémicos (como arritmias ventriculares, nueva aparición o empeoramiento de insuficiencia cardíaca, nuevos cambios en el segmento ST, inestabilidad hemodinámica, nuevas ondas Q patológicas en al menos dos derivaciones contiguas, pruebas de imagen de nueva pérdida de miocardio viable o nuevas alteraciones segmentarias de la contractilidad), y
- Biomarcadores cardíacos elevados (preferible CK-MB) en las primeras 72 h después del procedimiento, que consiste en al menos una muestra post-TAVI con un valor pico > 15 veces el límite superior de referencia para la troponina o 5 veces para CK-MB. Si los biomarcadores cardíacos están incrementados basalmente (> percentil 99), se requiere un aumento adicional de al menos el 50% en los valores post-TAVI.

2. Infarto agudo de miocardio espontáneo (> 72 h tras el procedimiento). Cualquiera de los siguientes criterios:

– La detección de subida y/o caída de los biomarcadores cardiacos (preferiblemente troponina) con al menos un valor por encima del percentil 99, junto con evidencia de isquemia miocárdica con al menos uno de los siguientes:

Síntomas de isquemia.

Cambios en el electrocardiograma indicativos de nueva isquemia (nuevos cambios del segmento ST-T o nuevo bloqueo de rama izquierda).

Nuevas ondas Q patológicas en al menos dos derivaciones contiguas.

Pruebas de imagen de una nueva pérdida de miocardio viable o nueva alteración segmentaria de la contractilidad.

– Muerte cardiaca súbita e inesperada que implica parada cardiaca, a menudo con síntomas de isquemia miocárdica acompañados de presuntamente nueva elevación del segmento ST o nuevo bloqueo de rama izquierda y/o evidencia de nuevo trombo por angiografía coronaria y/o en la autopsia, pero la muerte ocurre antes de que se pueda obtener muestras de sangre o en un momento antes de la aparición de los biomarcadores cardiacos en la sangre.

– Hallazgos patológicos de un infarto agudo de miocardio.

- Ictus y accidente isquémico transitorio. Recogido según las definiciones VARC-2:

– Criterios diagnósticos:

Episodio agudo de un déficit neurológico focal o global con al menos uno de los siguientes: cambio en el nivel de conciencia, hemiplejía, hemiparesia, entumecimiento o pérdida de sensibilidad que afecta a un lado del cuerpo, disfasia o afasia, hemianopsia, *amaurosis fugax* u otros signos neurológicos o síntomas compatibles con un ictus.

Ictus: duración de un déficit neurológico focal o global > 24 h o < 24 h si hay disponible documentación de neuroimagen de una nueva hemorragia o infarto o si el déficit neurológico resulta en muerte.

Accidente isquémico transitorio: duración de un déficit neurológico focal o global < 24 h; cualquier prueba de neuroimagen no demuestra una nueva hemorragia o infarto.

No hay ninguna otra causa fácilmente identificable para la presentación clínica (p. ej., tumor cerebral, traumatismo, infección, hipoglucemia, lesión periférica, influencias farmacológicas), a determinar por o en conjunto con el neurólogo designado.

Confirmación del diagnóstico por al menos uno de los siguientes: neurólogo o especialista en neurocirugía; prueba de neuroimagen (tomografía computarizada o resonancia magnética del cerebro), pero el ictus puede ser de diagnóstico clínico por sí solo.

- Clasificación del ictus:

Isquémico: episodio agudo de disfunción focal cerebral, espinal o retiniana causado por infarto del tejido del sistema nervioso central.

Hemorrágico: episodio agudo de disfunción focal o global cerebral, espinal causado por hemorragia o intraparenquimatoso, intraventricular o subaracnoideo.

Un derrame cerebral puede clasificarse como indeterminado si no hay suficiente información para permitir la categorización como isquémico o hemorrágico.

- Definiciones de ictus:

Ictus invalidante: Escala Modificada de Rankin (EMR)  $\geq 2$  a los 90 días y aumento de al menos una categoría EMR desde la basal.

Ictus no invalidante: una puntuación EMR < 2 a 90 días o aquel que no resulta en aumento de al menos una categoría EMR desde la basal.

- Infección nosocomial: Toda infección adquirida durante el ingreso por el procedimiento. Por extensión, toda infección hasta las 72 h del alta hospitalaria se considera nosocomial.

- Insuficiencia renal aguda post-TAVI sin necesidad de hemodiálisis. Se tomó la definición clásica derivada del intervencionismo coronario: cualquier incremento de la creatinina > 0,5 mg/dl o > 50% de la cifra basal, atribuible al procedimiento. Los pacientes que requirieron hemodiálisis se recogieron en una variable separada.



- Insuficiencia renal aguda post-TAVI que precisa hemodiálisis. También incluye cualquier otra técnica de depuración extrarrenal como la hemofiltración.
- Intubación prolongada. La que se prolonga > 24 h post-TAVI. Por protocolo, se intervino a todos los pacientes con anestesia general, intentando en todos los casos la extubación en la misma sala de hemodinámica o lo más precozmente posible.
- Nuevo implante de marcapasos definitivo.
- Muerte. Variable principal del estudio. Se recogió el hecho de la muerte y su causa. Recogida según las definiciones del VARC-2:

- Mortalidad por todas las causas.
- Mortalidad cardiovascular. Cualquiera de los siguientes criterios:
  - Muerte debida a una causa cardíaca inmediata (p. ej., infarto de miocardio, taponamiento cardíaco, empeoramiento de insuficiencia cardíaca).
  - Muerte causada por enfermedades vasculares no coronarias, tales como eventos neurológicos, embolia pulmonar, aneurisma aórtico roto, aneurisma disecante u otra enfermedad vascular.
  - Todas las muertes relacionadas con el procedimiento, incluidas las relacionadas con una complicación del procedimiento o el tratamiento de una complicación del procedimiento.
  - Todas las muertes relacionadas con la válvula, incluidos la disfunción valvular estructural o no estructural y otros eventos adversos relacionados con la válvula.
  - La muerte súbita o sin testigos.
  - La muerte de causa desconocida.

- Mortalidad no cardiovascular: cualquier muerte en la que la principal causa de muerte está claramente relacionada con otras situaciones (p. ej., traumatismo, cáncer, suicidio).

- Hemorragia. Se recogieron únicamente los producidos durante el ingreso hospitalario del procedimiento. Se clasificaron según las definiciones VARC-2:

*1. Hemorragia potencialmente mortal o incapacitante*

- Hemorragia fatal (*Bleeding Academic Research Consortium* [BARC] tipo 5), o
- Hemorragia en un órgano crítico, tales como intracraneal, intraespinal, intraocular o pericárdica que precisa pericardiocentesis o intramuscular con síndrome compartimental (BARC tipo 3b y 3c), o
- Hemorragia que causa *shock* hipovolémico o hipotensión grave que requiere vasopresores o cirugía (BARC tipo 3b), o
- Hemorragia manifiesta con caída en la hemoglobina > 5 mg/dl o transfusión de sangre completa o concentrado de hematíes > 4 unidades (BARC tipo 3b).

2. *Hemorragia mayor (BARC tipo 3a)*

- Hemorragia manifiesta, ya sea asociada a una caída de la hemoglobina de al menos 3 mg/dl o con necesidad de transfusión de 2 o 3 unidades de sangre completa o concentrado de hematíes o que causa ingreso o lesiones permanentes o requiere cirugía y
- No cumple con los criterios de hemorragia potencialmente mortal o incapacitante.

3. *Hemorragia menor (BARC tipo 2 o 3a, dependiendo de la gravedad)*

- Cualquier hemorragia digna de mención clínica (p. ej., hematoma de punto de acceso) que no califica como potencialmente mortal, discapacitante, o mayor.
- Taponamiento cardíaco (según definición del VARC-2): evidencia de nuevo derrame pericárdico asociado a inestabilidad hemodinámica y claramente relacionado con el TAVI. Incluido en la categoría de hemorragia amenazante para la vida.
- Transfusión. De concentrados de hematíes. No necesariamente asociada a hemorragia.

**C. Variables combinadas del VARC-2**

- Éxito del dispositivo (*device success*). Supervivencia del procedimiento, implante de una sola prótesis aórtica en su posición anatómica correcta y normofunción de la prótesis (ausencia de *mismatch*, gradiente medio < 20 mmHg o velocidad pico < 3 m/s y ausencia de insuficiencia protésica moderada o grave).

- Seguridad precoz a 30 días (*early safety*). Variable combinada modificada de la definición del VARC-2 y medida a los 30 días del procedimiento: mortalidad por cualquier causa, cualquier ictus, hemorragia que amenaza la vida, daño renal agudo post-TAVI con la definición de este estudio (en documento del VARC-2, AKIN grado 2-3), obstrucción coronaria que requiere intervención, complicación vascular mayor o disfunción protésica que requiere intervención (sustitución valvular quirúrgica, TAVI, valvuloplastia).
- Eficacia clínica después de 30 días (*clinical efficacy*). Mortalidad por cualquier causa, cualquier ictus, rehospitalización por síntomas relacionados con la prótesis o empeoramiento de insuficiencia cardíaca, progresión a clase funcional de la *New York Heart Association* III-IV o disfunción protésica. Se utilizó como definición de evento adverso mayor en el seguimiento.
- Disfunción protésica (*structural valve deterioration*). Gradiente medio  $> 20$  mmHg, orificio valvular efectivo  $< 0,9-1,1 \text{ cm}^2$  y/o índice de velocidad Doppler  $< 0,35$  m/s o insuficiencia moderada o grave de la prótesis o necesidad de resustitución valvular. El índice de velocidad Doppler no se midió sistemáticamente en este estudio.
- Seguridad protésica relacionada con el tiempo (*time-related valve safety*). Variable combinada propuesta en definiciones del VARC-2 no utilizada en este estudio.

## BIBLIOGRAFÍA

1. EuroSCORE. Escala de riesgo quirúrgico [citado 16 Mar 2015]. Disponible en: <http://www.euroscore.org/calcp.html>
2. EuroSCORE-2. Escala de riesgo quirúrgico [citado 16 Mar 2015]. Disponible en: <http://www.euroscore.org/calc.html>
3. Society of Thoracic Surgeons, escala de riesgo de la sociedad norteamericana de cirujanos cardio-torácicos [citado 16 Mar 2015]. Disponible en: <http://riskcalc.sts.org/>
